# Supplementary material for: Quantitative analysis of NO2 in the presence of CO using a single tungsten oxide semiconductor sensor and dynamic signal processingElectronic Supplementary Information (ESI) available: NIPALS algorithm, the PLS algorithm for one C variable, backpropagation learning algorithm, RBF network training algorithm, ART1 and Fuzzy ART mathematical models. See http://www.rsc.org/suppdata/an/b2/b205009a/
Source: Royal Society of Chemistry journal article supplement (doi:10.1039/b205009a), 2002-08-07
Supplement: appendix.doc [file appendix.doc]

**APPENDIX**

*The NIPALS algorithm*

For factors *k* = 1,2,, K compute *pk* and *lk* from ***R****k*-1

Step 0. Initialise: Selection of start values, e.g. *pk* = the column in ***R****k*-1 with highest sum of squares.

Repeat until convergence {

Step 1. Improve estimate of loading vector by projecting ***R****k*-1 on *pk*:

a.1

Step 2. Scale the length of *lk* to unity:

a.2

Step 3. Improve estimate of score vector by projecting ***R****k*-1 on *lk*:

a.3

Step 4. Improve estimate of the eigenvalue *k*:

*k* = a.4

Step 5. Check convergence: If the difference between the value of the eigenvalue in this iteration and the value in the previous iteration is below a specified small value, the method has converged for factor *k*.

Then compute the residual matrix:

***R****k* = ***R****k*-1 - a.5

and go to Step 0 and repeat process for factor *k*+1.

If the convergence criterion is not fulfilled then return to Step 1. }

*The PLS algorithm for one* ***C*** *variable*

The input variables are first mean-centred:

For each factor *k* = 1,, *K* do

Begin

Step 1. Compute the loading weights *lk* using least squares and the local model:

a.6

and scale the vector to length 1:

a.7

where *s* is a scaling factor that makes the length of vector equal to 1.

Step 2. Estimate the scores *pk* using the local model:

a.8

since , the least squares solution is

a.9

Step 3. Estimate the spectral loading using the local model:

a.10

which gives the least squares solution

a.11

Step 4. Estimate the chemical loading *uk* using the local model:

which leads to

Step 5. Create new residuals by subtracting the estimated effect of this factor and replace and by the new residuals, increase the value of *k*:

a.12

a.13

*k* = *k*+1 a.14

end

Final step. Once the *K* factors have been estimated, compute *b*0 and *b*, to be used for prediction:

a.15

a.16

Therefore, during the prediction phase the concentration estimate associated to the mean-centred response vector can be obtained as follows:

a.17

*Backpropagation learning algorithm*

Consider a three-layer network (e.g. with input, hidden and output layers). Output neurones have linear activation functions while hidden neurones have logistic sigmoid activation functions given by:

a.18

Its first derivative, f’(a) can be expressed in the simple form:

a.19

For a standard sum of squares error function, the error for training vector *k* is given by

a.20

where *yj* is the response of output neurone *j*, *tk* is the corresponding target for learning vector (i.e. input vector) *k*, and *c* is the number of neurones in the output layer.

The error for an output neurone *j* is while for a neurone in the hidden layer is

a.21

where *zj* is the output of hidden neurone *j*, and *wji* is the weight from hidden neurone *j* to output neurone *i*.

The error derivatives with respect of the weights of the hidden and output layers are given by

a.22

If the weights of the hidden layer neurones are updated after the presentation of each learning vector (fixed-step gradient descent technique) then:

a.23

where ** (0<**<1) is a scalar called learning rate.

*RBF network training algorithm*

In a first phase of training, the available learning vectors should be used to determine the number of radial basis neurones and their governing parameters in an unsupervised way [26]. In the second step, supervised training is used to adjust the parameters of the output layer.

The radial basis function network mapping is:

a.24

The biases *wj*0 can be absorbed into the summation by including an extra basis function *f*0 whose activation is set to 1 and (a.24) can be rewritten in matrix notation:

***z***(*r*) = ***Wf*** a.25

where ***W*** is the weights’ matrix. Since the basis function are considered fixed and, considering a sum-of-squares error function given by

a.26

where is the target value for output *j* when the network is presented with learning vector *rn*.

Since the error function is a quadratic function of the weights, the formal solution for the weights is

***W****t* = ***f*******T***  a.27

where the element in position (*n*, *j*) in ***T*** is , the element in position (*n*, *j*) in ***f*** is *fj*(*rn*), and super-indexes *t* and * denote the transpose and pseudo-inverse, respectively.

*ART1 and Fuzzy ART mathematical models*

ART1

Let ***I*** = (*I1*, ... , *IM*) be the input vector where *Ii* = 1 or 0 (ART1 requires binary inputs) and ***X*** = (*X1*, ... , *XM*) be the vector of F1 nodes where *Xi* = 1 or 0.

Let *wJi* be the top-down weight from the winning node J in the F2 layer (F2 is a competitive layer) to a node *i* in the F1 layer, and let *ziJ* be the corresponding bottom-up weight. Assuming fast learning (e.g. weight update equations reach their asymptotic values before the next training vector is presented), the weights take the values:

a.28

a.29

where is the cardinality of ***X***, and L is a network parameter (L>1).

If ***WJ*** is the vector of top-down weights from the winning neurone in F2 and ***ZJ*** is the vector of bottom-up weights, (a.28) and (a.29) can be rewritten as follows:

***WJ*** = ***X***  a.30

a.31

A given node *j* in the F2 layer gets the following input from the F1 layer:

a.32

Using (a.31), equation (a.32) can be rewritten in terms of the top-down weights:

a.33

The summation term in (a.33) is the number of common 1s the vectors ***Wj*** and ***I*** have in corresponding positions. Then equation (a.33) can be rewritten as:

a.34

where is the cardinality of the intersection set of ***Wj*** and ***I***.

Category choice is made by selecting the neurone in F2 with the maximum value for ***tj***. Thus the Choice Function can be defined as:

a.35

A given node *i* in the F1 layer is active only if both top-down weight *W****Ji*** from the winning F2 node and the input to node *i* are non-zero:

***X*** = a.36

The winning node *J* in the F2 layer is reset by the orienting subsystem if:

 a.37

where  is the vigilance parameter. Once a node is reset, it remains inactive for the duration of the trial.

### Fuzzy ART

Fuzzy ART is a generalisation of the equations (a.35) to (a.37). The generalisation is achieved by using fuzzy set theory operations rather than binary set theory operations.

Input nodes can take values between 0 and 1 (analog patterns). The wining neurone in the F2 layer (e.g. wining category) is the one for which the choice function attains its maximum value. The new choice function, derived from (a.35) is as follows:

a.38

where is the equivalent operation in fuzzy set theory of the intersection of ***Wj*** and ***I*** in standard set theory. Thus,

= (min(*I1*, *wj1*), ... , min(*Ii*, *wji*), ... , min (*IM*, *wjM*)) a.39

and the expression for the cardinality is as follows:

a.40

The winning category is reset by the vigilance subsystem if:

 a.41

When a node in F2 is first committed (e.g. because novelty has been detected), a fast commit equation is used:

a.42

Once a node has been committed, as slow recode equation is usedto change the weights towards the spatial position of the actual input vector:

a.43

The slow recode of committed nodes prevents noisy data from erroneously recoding them. Small values of  cause the system to base its results on a long-term average of its experience, while values of  near one allow adaptation to a rapidly changing environment.
